# Supplementary material for: Solvothermal synthesis of ZnO-decorated α-Fe2O3nanorods with highly enhanced gas-sensing performance toward n-butanol
Source: Royal Society of Chemistry journal article supplement (doi:10.1039/c4ta01837k), 2014-01-01
Supplement: c4ta01837k1.pdf [file c4ta01837k1.pdf]

## Supporting Information for:

### **Solvothermal Synthesis of ZnO-Decorated $\alpha$ -Fe<sub>2</sub>O<sub>3</sub> Nanorods with Highly Enhanced Gas-Sensing Performance toward n-Butanol**

Yusuf V. Kaneti<sup>a</sup>, Quadir M.D. Zakaria<sup>a</sup>, Zhengjie Zhang<sup>a</sup>, Chuyang Chen<sup>a</sup>, Jeffrey Yue<sup>b</sup>,  
Minsu Liu<sup>a</sup>, Xuchuan Jiang<sup>a,\*</sup> and Aibing Yu<sup>a</sup>

<sup>a</sup>*School of Materials Science and Engineering, The University of New South Wales, Sydney NSW 2052, Australia*

<sup>b</sup>*Department of Chemical Engineering, University College London, Torrington Place, London WC1E 7JE, United Kingdom.*

#### **1. Gas-sensing measurement system diagram**

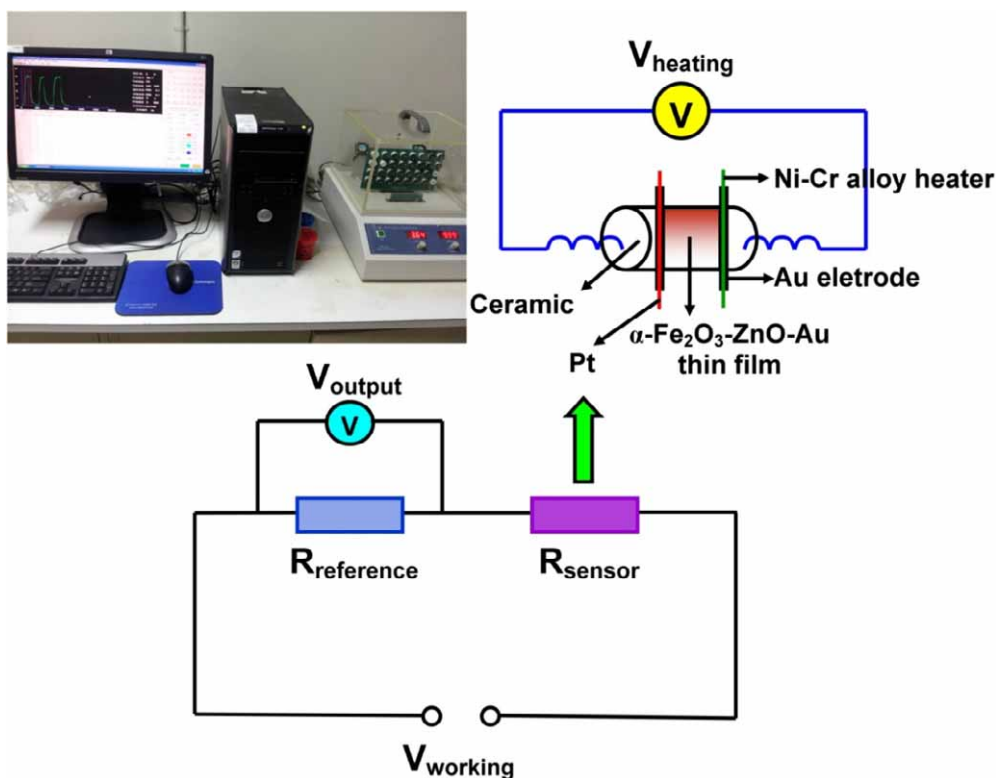

**Fig. S1** Schematic diagram of the gas-sensing measurement system.

\* To whom correspondence should be addressed. Email: xcjiang@unsw.edu.au.

## 2. Digital photographs of the sensors

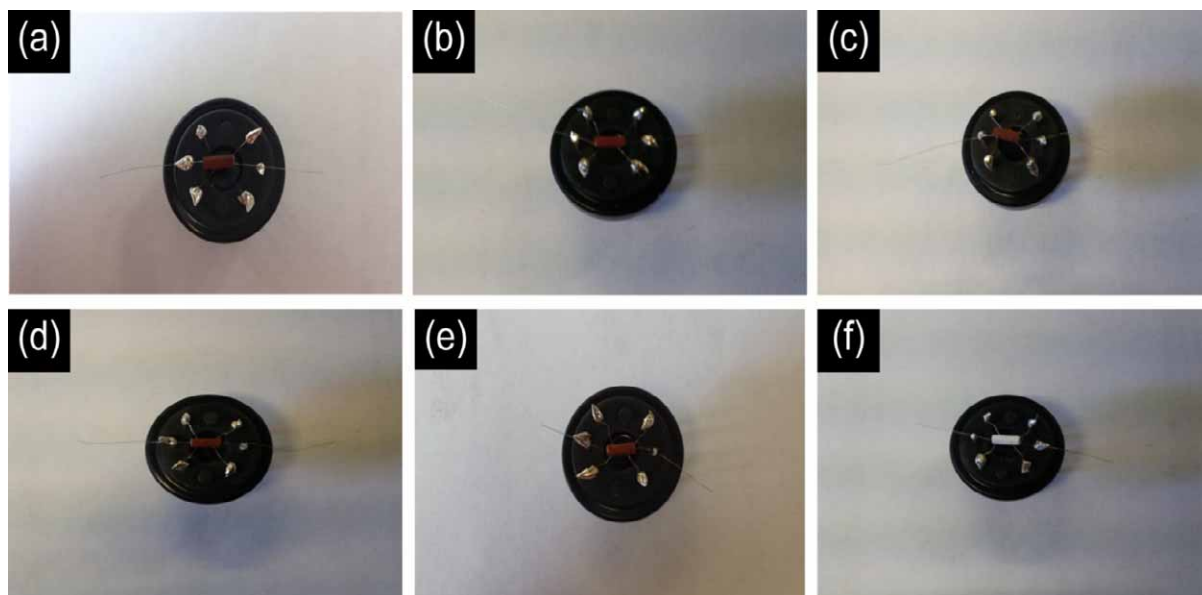

**Fig. S2** Digital photographs of the prepared sensors: (a)  $\alpha$ -Fe<sub>2</sub>O<sub>3</sub> nanorods, (b)  $\alpha$ -Fe<sub>2</sub>O<sub>3</sub>/ZnO (S1), (c)  $\alpha$ -Fe<sub>2</sub>O<sub>3</sub>/ZnO (S2), (d)  $\alpha$ -Fe<sub>2</sub>O<sub>3</sub>/ZnO (S3), (e)  $\alpha$ -Fe<sub>2</sub>O<sub>3</sub>/ZnO (S4), and (f) ZnO nanorods.

*3. SEM images of  $\alpha$ -Fe<sub>2</sub>O<sub>3</sub> nanorods, ZnO decorated  $\alpha$ -Fe<sub>2</sub>O<sub>3</sub> nanorods, and ZnO nanorods*

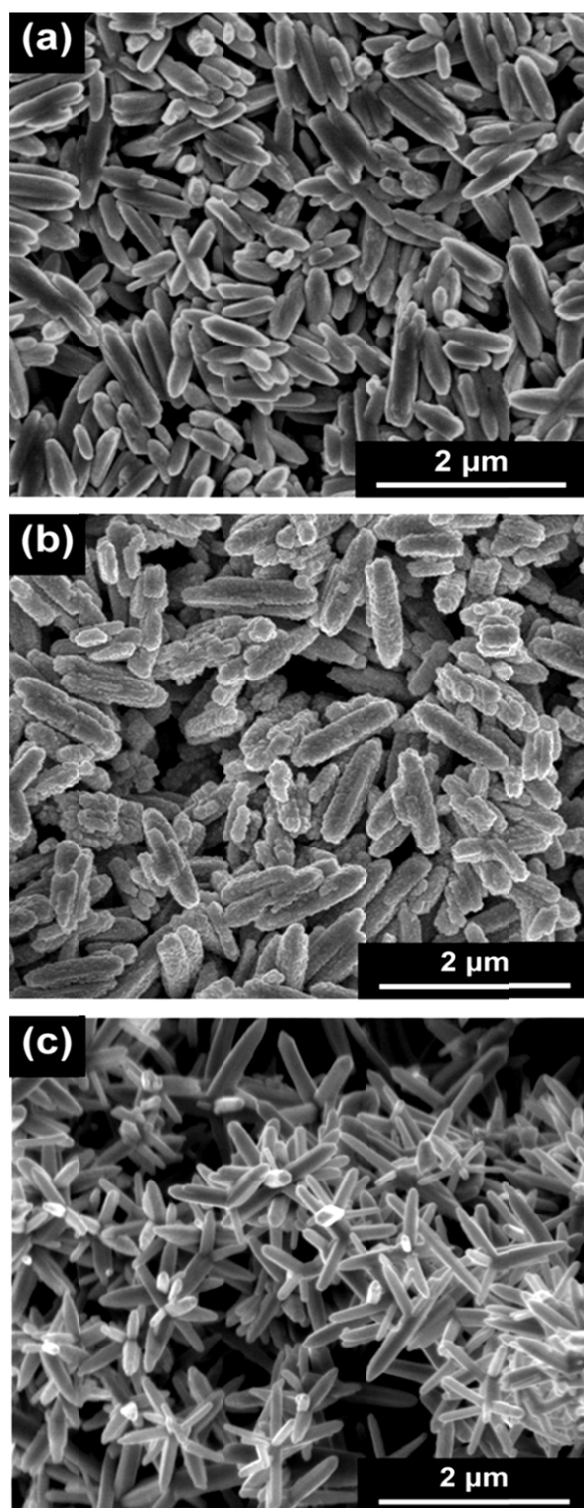

**Fig. S3** SEM images of: (a)  $\alpha$ -Fe<sub>2</sub>O<sub>3</sub> nanorods, (b) ZnO decorated  $\alpha$ -Fe<sub>2</sub>O<sub>3</sub> nanorods, and (c) ZnO nanorods.

#### 4. Effect of Zinc Precursor - TEM images

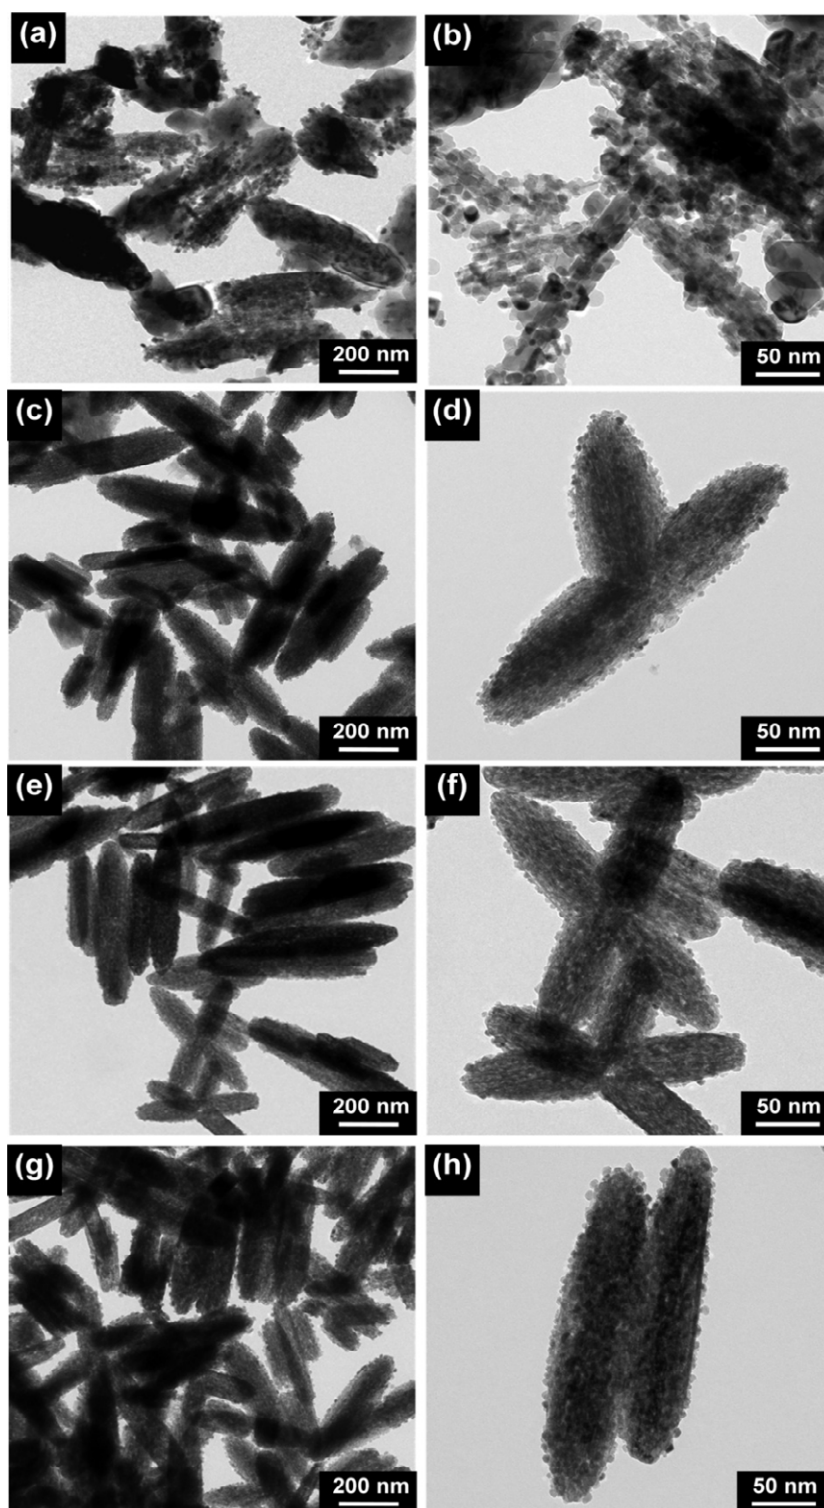

**Fig. S4** TEM images of  $\alpha$ -Fe<sub>2</sub>O<sub>3</sub>/ZnO products obtained with different amounts of Zn precursor (ZnSO<sub>4</sub>·7H<sub>2</sub>O): (a, b) 0.0036 g (S1), (c, d) 0.018 g (S2), (e, f) 0.0269 g (S3), and (g, h) 0.0359 g (S4).

## 5. BET Surface Area and pore-size distribution

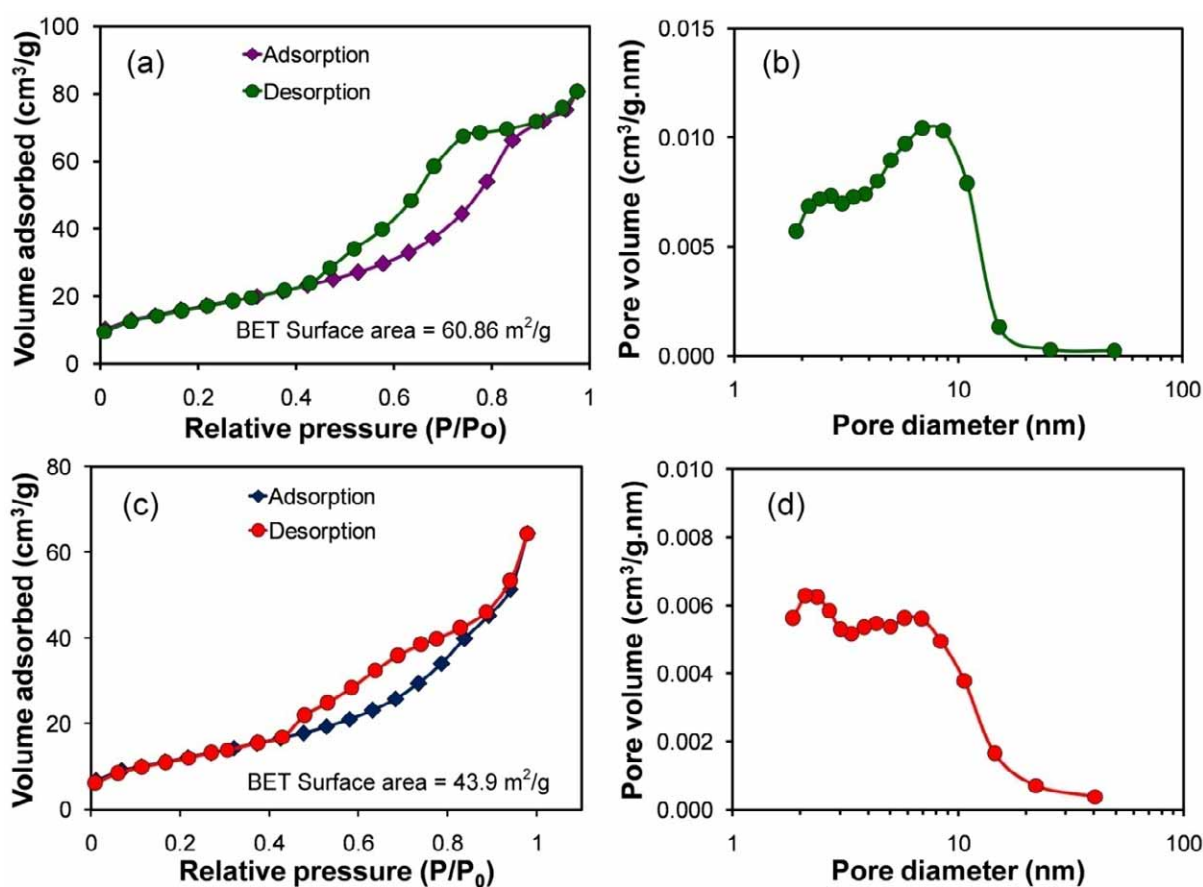

**Fig. S5** The N<sub>2</sub> adsorption-desorption isotherms and pore size distribution plots of: (a, b) pure  $\alpha$ -Fe<sub>2</sub>O<sub>3</sub> nanorods and (b) ZnO decorated  $\alpha$ -Fe<sub>2</sub>O<sub>3</sub> nanorods (S4).

Fig. S5a and b show the N<sub>2</sub> adsorption-desorption isotherms and Barret-Joyner-Halenda (BJH) pore size distribution plot of the porous  $\alpha$ -Fe<sub>2</sub>O<sub>3</sub> nanorods. Based on the IUPAC classification, the isotherm can be ascribed to a type IV isotherm with a type H1 hysteresis loop in the  $P/P_0$  range of ~0.4-0.9. The BJH distribution plot shown in Figure S5b shows the presence of a primary pore size distribution peak centered at ~2.5 nm and a secondary distribution peak centered at 8 nm. These results indicate the mesoporous nature of the as-prepared  $\alpha$ -Fe<sub>2</sub>O<sub>3</sub> nanorods. The BET surface area of the as-synthesized  $\alpha$ -Fe<sub>2</sub>O<sub>3</sub> nanorods is measured to be 60.86 m<sup>2</sup>/g. In comparison, The BET surface area of the ZnO-decorated  $\alpha$ -Fe<sub>2</sub>O<sub>3</sub> nanorods (sample S4) is slightly lower (~44 m<sup>2</sup>/g), because of the slight increase in the

sizes of the  $\alpha$ -Fe<sub>2</sub>O<sub>3</sub> nanorods during the ZnO coating process in the autoclave (at 180 °C). The BJH distribution plot of the ZnO-decorated  $\alpha$ -Fe<sub>2</sub>O<sub>3</sub> nanorods shown in Figure S5d shows the presence of a primary pore size distribution peak centered at ~2.2 nm and a secondary distribution peak centered at ~7 nm. Similar to the pure  $\alpha$ -Fe<sub>2</sub>O<sub>3</sub> nanorods, the isotherm of the ZnO-decorated  $\alpha$ -Fe<sub>2</sub>O<sub>3</sub> nanorods can also be indexed to a type IV isotherm with a type H3 hysteresis loop in the  $P/P_0$  range of ~0.4-0.95. The BJH pore distribution plot of the ZnO-decorated  $\alpha$ -Fe<sub>2</sub>O<sub>3</sub> nanorods depicted in Figure S5d reveals the existence of a primary pore size distribution peak centered at ~2.2 nm and a secondary distribution peak centered at ~7 nm, which confirms their mesoporous nature.

## 6. Dynamic response-recovery curves toward methanol, ethanol, and acetone

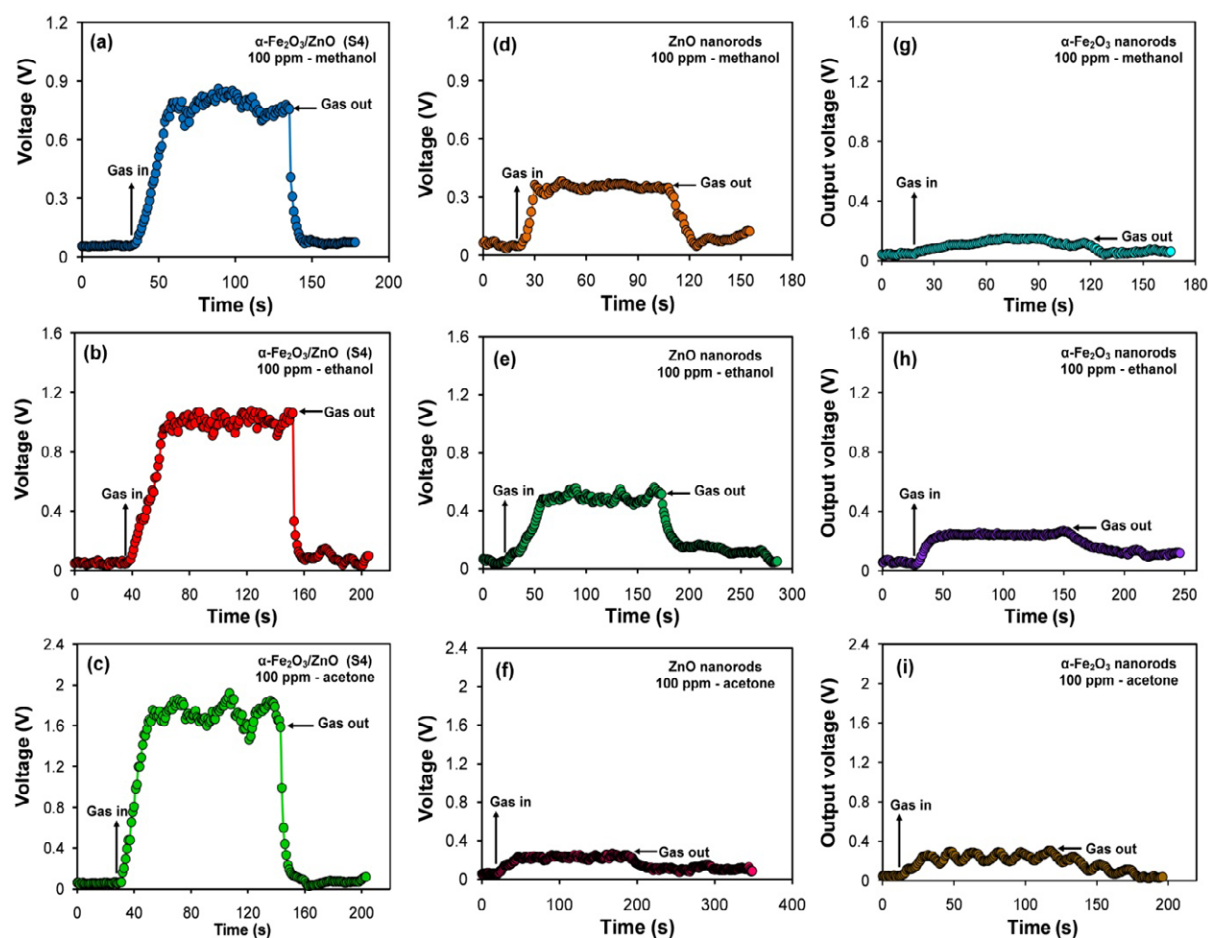

**Fig. S6** Dynamic response-recovery curves of ZnO-decorated  $\alpha$ -Fe<sub>2</sub>O<sub>3</sub> nanorods (S4) toward 100 ppm of (a) methanol, (b) ethanol, and (c) acetone; Dynamic response-recovery curves of ZnO nanorods toward 100 ppm of (d) methanol, (e) ethanol, and (c) acetone; Dynamic response-recovery curves of  $\alpha$ -Fe<sub>2</sub>O<sub>3</sub> nanorods toward 100 ppm of (g) methanol, (h) ethanol, and (i) acetone.

## 7. Additional gas-sensing experiments- ZnO nanoparticles

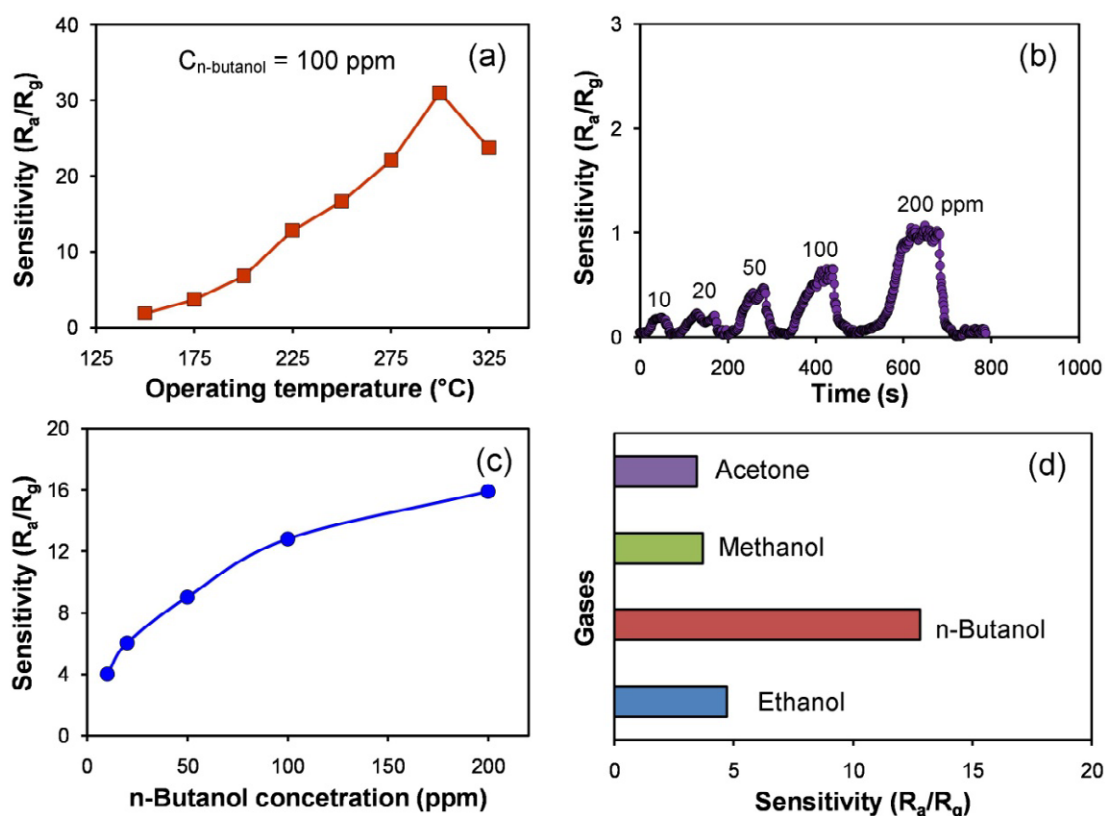

**Fig. S7** The sensitivity of the sensor based on ZnO nanoparticles toward 100 ppm of n-butanol as a function of the operating temperature, (b) dynamic response-recovery behaviors of the ZnO nanoparticle sensor toward various concentrations of n-butanol at the optimum working temperature of 225  $^{\circ}\text{C}$ , (c) the sensitivity vs. concentration curves of the ZnO nanoparticle sensor toward n-butanol at 225  $^{\circ}\text{C}$ , and (d) selectivity tests of the ZnO nanoparticle sensor toward various VOCs at 225  $^{\circ}\text{C}$ .

Additional gas-sensing tests have been performed for ZnO nanoparticles prepared by the same procedure used for decorating the  $\alpha\text{-Fe}_2\text{O}_3$  nanorods as shown in Fig. S7. The results show that the sensor based on ZnO nanoparticles exhibits the maximum sensitivity toward n-butanol at a higher optimum operating temperature of 300  $^{\circ}\text{C}$ . The concentration dependent test show that the ZnO nanoparticles exhibit a sensitivity of  $S = 12.8$  toward 100 ppm of n-butanol at 225  $^{\circ}\text{C}$ , which is approximately 4.5 times lower than the ZnO-decorated  $\alpha\text{-Fe}_2\text{O}_3$



nanorods and is comparable to the gas-sensing properties of pure  $\alpha$ -Fe<sub>2</sub>O<sub>3</sub> nanorods. This suggests that synergistic effects, arising from the combination of the two materials, may have been responsible for the enhanced performance of the  $\alpha$ -Fe<sub>2</sub>O<sub>3</sub>/ZnO nanocomposites.
